# Supplementary material for: A Comprehensive Comparison of Early-Onset and Average-Onset Colorectal Cancers
Source: Oxford University Press journal article supplement (doi:10.1093/jnci/djab124), 2021-07-15
Supplement: djab124_supplementary_data.zip [file djab124_supplementary_data.zip]

Archive with 2 entries (2 files):
- 21-0130R1 Cercek supp mat_060221.pdf
- 21-0130R1 Cercek Supplementary Tables 1, 3-5_052521.xlsx
